# Supplementary material for: Trends in the Use of Driving-Impairing Medicines According to the DRUID Category: A Population-Based Registry Study with Reference to Driving in a Region of Spain between 2015 and 2019
Source: MDPI journal article supplement (doi:10.3390/ph16040508), 2023-03-29
Supplement: s1 [file s1]

**Table S1.** Definition of DRUID categories

| Data to be used for assigning category | DRUID CATEGORIES                                                                                             |                                                                                                                                                     |                                                                                                                                                                                       |
|----------------------------------------|--------------------------------------------------------------------------------------------------------------|-----------------------------------------------------------------------------------------------------------------------------------------------------|---------------------------------------------------------------------------------------------------------------------------------------------------------------------------------------|
|                                        | MINOR INFLUENCE                                                                                              | MODERATE INFLUENCE                                                                                                                                  | MAJOR INFLUENCE                                                                                                                                                                       |
| Pharmacodynamic and kinetic data       | No influence expected                                                                                        | Moderate influence expected                                                                                                                         | Severe influence expected                                                                                                                                                             |
| Pharmacovigilance data                 | Some demonstrate of CNS side effects or unwanted effects that impairing driving                              | Demonstration of CNS side effects (not severe) or unwanted effects that impairing driving                                                           | Demonstration of CNS side effects (severe) or unwanted effects that impairing driving                                                                                                 |
| Experimental and epidemiology data     | Some impairment in some experimental studies. Slight increased risk demonstrated in epidemiological studies. | Impairment of driving performance is seen in various experimental studies. In epidemiological studies a significant increased risk is demonstrated. | Gross impairment of driving performance or performance related to driving is repeatedly seen. In epidemiological studies a significant and meaningful increased risk is demonstrated. |
| Additional data                        | Some data on possible impairment.                                                                            | Various data on impairment (not severe).                                                                                                            | Data on severe impairment.                                                                                                                                                            |

**Table S2.** List of the 20 most consumed DIMs according to DRUID classification in Castile and Leon during the study period (packages/year).

| DRUID I  |                            |          | DRUID II |                                      |          | DRUID III |                            |          |
|----------|----------------------------|----------|----------|--------------------------------------|----------|-----------|----------------------------|----------|
| Code ATC | Name                       | Packages | Code ATC | Name                                 | Packages | Code ATC  | Name                       | Packages |
| N02BB02  | Metamizole sodium          | 950616   | N02AJ06  | Codeine and paracetamol              | 242350   | N05BA06   | Lorazepam                  | 892805   |
| N06AB10  | Escitalopram               | 256906   | N02BF02  | Pregabalin                           | 237229   | N05BA12   | Alprazolam                 | 780861   |
| N06AB06  | Sertraline                 | 211002   | N05CF02  | Zolpidem                             | 225084   | N02AJ13   | Tramadol and paracetamol   | 616769   |
| A10BD07  | Metformin and sitagliptin  | 185756   | N06AX16  | Venlafaxine                          | 213957   | N05CD06   | Lormetazepam               | 512782   |
| N06AB05  | Paroxetine                 | 175318   | N06AX21  | Duloxetine                           | 173940   | N05BA08   | Bromazepam                 | 358449   |
| A10BD08  | Metformin and vildagliptin | 158585   | N05BA05  | Potassium clorazepate                | 150847   | N05BA01   | Diazepam                   | 234307   |
| A10AE04  | Insuline glargine          | 155976   | N05AH04  | Quetiapine                           | 126580   | N06AX11   | Mirtazapine                | 210905   |
| N06AB04  | Citalopram                 | 88208    | N02AB03  | Fentanyl                             | 119808   | N06AA09   | Amitriptyline              | 133467   |
| A10BB09  | Glicazide                  | 83782    | R03DA12  | Mepyramine theophyllinacetate        | 117311   | N02AX02   | Tramadol                   | 122596   |
| N06AB03  | Fluoxetine                 | 82129    | N03AX14  | Levetiracetam                        | 112675   | N06AX05   | Trazodone                  | 101427   |
| A10BX02  | Repaglinide                | 74773    | N05AH03  | Olanzapine                           | 89232    | N05BA10   | Ketazolam                  | 49319    |
| N06BA04  | Methylphenidate            | 68203    | N03AE01  | Clonazepam                           | 85763    | N02AJ14   | Tramadol and dexketoprofen | 33038    |
| A10BH01  | Sitagliptin                | 66598    | N03AG01  | Valproic acid                        | 80592    | N05AX13   | Paliperidone               | 26188    |
| A10BH05  | Linagliptin                | 60347    | N05AL01  | Sulpiride                            | 80559    | N05AA02   | Levomepromazine            | 25666    |
| A10BB12  | Glimepiride                | 42670    | N06AX23  | Desvenlafaxine                       | 74868    | N06AX03   | Mianserine                 | 18223    |
| N05CM02  | Clomethiazole              | 41229    | N03AX12  | Gabapentine                          | 72669    | N05CD11   | Loprazolam                 | 17339    |
| P01BA02  | Hydroxychloroquine         | 40461    | N04BA02  | Levodopa and decarboxylase inhibitor | 69619    | N05CF01   | Zopiclone                  | 16929    |
| A10BK01  | Dapagliflozin              | 34716    | N03AX09  | Lamotrigine                          | 62862    | N05AX08   | Risperidone intravenous    | 15688    |
| A10AB05  | Insulin aspart             | 33020    | N06DA02  | Donepezil                            | 58355    | N03AA02   | Phenobarbital              | 14661    |
| N01BB02  | Lidocaine                  | 32392    | N05AX08  | Risperidone                          | 58005    | N02AB03   | Fentanyl                   | 13607    |

Abbreviations: ATC, Anatomic Therapeutic Chemical

**Table S3:** Evolution of the Castile and Leon population and driver's licenses (2015-2019).

| Rank age     | Population              |                  |                  |                  |                  |                  |                  |                  |                  |                  |                  |                  |                  |                  |                  |
|--------------|-------------------------|------------------|------------------|------------------|------------------|------------------|------------------|------------------|------------------|------------------|------------------|------------------|------------------|------------------|------------------|
|              | 2015                    |                  |                  | 2016             |                  |                  | 2017             |                  |                  | 2018             |                  |                  | 2019             |                  |                  |
|              | Male                    | Female           | Total            | Male             | Female           | Total            | Male             | Female           | Total            | Male             | Female           | Total            | Male             | Female           | Total            |
| 0-4          | 45.405                  | 42.504           | 87.909           | 44.382           | 41.386           | 85.768           | 42.905           | 40.144           | 83.049           | 41.604           | 39.121           | 80.725           | 40.059           | 38.097           | 78.156           |
| 5-9          | 50.925                  | 48.078           | 99.003           | 50.665           | 47.821           | 98.486           | 50.035           | 47.344           | 97.379           | 48.594           | 45.657           | 94.251           | 47.764           | 44.531           | 92.295           |
| 10-14        | 49.439                  | 47.220           | 96.659           | 49.847           | 47.730           | 97.577           | 50.316           | 48.259           | 98.575           | 51.124           | 48.407           | 99.531           | 51.486           | 48.715           | 100.201          |
| 15-19        | 48.620                  | 46.904           | 95.524           | 48.862           | 46.935           | 95.797           | 48.939           | 46.706           | 95.645           | 49.610           | 47.885           | 97.495           | 50.274           | 48.195           | 98.469           |
| 20-24        | 54.724                  | 53.382           | 108.106          | 53.230           | 52.333           | 105.563          | 52.182           | 51.246           | 103.428          | 51.428           | 50.777           | 102.205          | 51.319           | 51.186           | 102.505          |
| 25-29        | 62.787                  | 61.247           | 124.034          | 61.109           | 59.382           | 120.491          | 59.522           | 57.531           | 117.053          | 58.298           | 56.506           | 114.804          | 56.603           | 54.511           | 111.114          |
| 30-34        | 75.089                  | 71.664           | 146.753          | 71.742           | 68.841           | 140.583          | 68.575           | 66.051           | 134.626          | 65.942           | 63.241           | 129.183          | 62.041           | 60.593           | 122.634          |
| 35-39        | 90.372                  | 87.031           | 177.403          | 87.267           | 83.676           | 170.943          | 83.600           | 80.400           | 164.000          | 79.663           | 76.944           | 156.607          | 74.317           | 72.988           | 147.305          |
| 40-44        | 92.686                  | 89.879           | 182.565          | 92.967           | 90.094           | 183.061          | 92.799           | 89.681           | 182.480          | 92.434           | 89.499           | 181.933          | 89.068           | 87.308           | 176.376          |
| 45-49        | 93.082                  | 91.643           | 184.725          | 93.035           | 91.392           | 184.427          | 92.076           | 90.588           | 182.664          | 91.744           | 89.952           | 181.696          | 90.343           | 88.978           | 179.321          |
| 50-54        | 93.252                  | 90.618           | 183.870          | 93.251           | 91.395           | 184.646          | 93.500           | 91.893           | 185.393          | 92.913           | 92.426           | 185.339          | 91.810           | 91.309           | 183.119          |
| 55-59        | 87.280                  | 84.212           | 171.492          | 88.988           | 85.894           | 174.882          | 89.831           | 86.956           | 176.787          | 90.852           | 87.988           | 178.840          | 91.071           | 89.305           | 180.376          |
| 60-64        | 72.448                  | 69.337           | 141.785          | 75.073           | 72.029           | 147.102          | 77.520           | 74.875           | 152.395          | 79.640           | 77.583           | 157.223          | 82.509           | 80.561           | 163.070          |
| 65-69        | 65.430                  | 66.777           | 132.207          | 66.403           | 67.268           | 133.671          | 67.615           | 68.053           | 135.668          | 67.660           | 67.825           | 135.485          | 68.270           | 67.745           | 136.015          |
| 70-74        | 56.526                  | 61.968           | 118.494          | 58.076           | 63.396           | 121.472          | 58.913           | 64.067           | 122.980          | 60.320           | 64.908           | 125.228          | 60.713           | 65.590           | 126.303          |
| 75-79        | 45.154                  | 56.939           | 102.093          | 43.540           | 53.807           | 97.347           | 43.510           | 52.990           | 96.500           | 46.205           | 55.251           | 101.456          | 49.158           | 58.079           | 107.237          |
| 80-84        | 44.543                  | 62.354           | 106.897          | 44.319           | 62.772           | 107.091          | 42.312           | 60.175           | 102.487          | 39.465           | 56.065           | 95.530           | 36.642           | 51.825           | 88.467           |
| 85-89        | 27.547                  | 46.335           | 73.882           | 28.618           | 47.555           | 76.173           | 29.407           | 48.337           | 77.744           | 29.731           | 48.690           | 78.421           | 30.015           | 48.916           | 78.931           |
| ≥ 90         | 13.282                  | 30.034           | 43.316           | 14.119           | 31.809           | 45.928           | 14.662           | 32.970           | 47.632           | 15.333           | 34.407           | 49.740           | 15.991           | 35.885           | 51.876           |
| <b>Total</b> | <b>1.168.591</b>        | <b>1.208.126</b> | <b>2.376.717</b> | <b>1.165.493</b> | <b>1.205.515</b> | <b>2.371.008</b> | <b>1.158.219</b> | <b>1.198.266</b> | <b>2.356.485</b> | <b>1.152.560</b> | <b>1.193.132</b> | <b>2.345.692</b> | <b>1.139.453</b> | <b>1.184.317</b> | <b>2.323.770</b> |
| Rank age     | Driver's licence census |                  |                  |                  |                  |                  |                  |                  |                  |                  |                  |                  |                  |                  |                  |
|              | 2015                    |                  |                  | 2016             |                  |                  | 2017             |                  |                  | 2018             |                  |                  | 2019             |                  |                  |
|              | Male                    | Female           | Total            | Male             | Female           | Total            | Male             | Female           | Total            | Male             | Female           | Total            | Male             | Female           | Total            |
| 15-19        | 9.282                   | 5.586            | 14.868           | 9.238            | 5.634            | 14.872           | 8.357            | 4.689            | 13.046           | 8.702            | 5.102            | 13.804           | 8.702            | 5.102            | 13.804           |
| 20-24        | 43.294                  | 35.387           | 78.681           | 42.165           | 34.280           | 76.445           | 40.859           | 33.207           | 74.066           | 39.837           | 32.570           | 72.407           | 39.837           | 32.570           | 72.407           |
| 25-29        | 55.831                  | 50.618           | 106.449          | 53.617           | 48.755           | 102.372          | 51.913           | 46.861           | 98.774           | 50.269           | 45.329           | 95.598           | 50.269           | 45.329           | 95.598           |
| 30-34        | 69.810                  | 61.387           | 131.197          | 66.192           | 58.489           | 124.681          | 62.677           | 56.134           | 118.811          | 59.765           | 53.560           | 113.325          | 59.765           | 53.560           | 113.325          |
| 35-39        | 86.841                  | 75.838           | 162.679          | 83.112           | 72.880           | 155.992          | 79.204           | 70.129           | 149.333          | 74.693           | 66.771           | 141.464          | 74.693           | 66.771           | 141.464          |
| 40-44        | 89.294                  | 76.277           | 165.571          | 88.673           | 76.856           | 165.529          | 88.025           | 76.717           | 164.742          | 87.163           | 76.513           | 163.676          | 87.163           | 76.513           | 163.676          |
| 45-49        | 90.151                  | 74.310           | 164.461          | 89.641           | 74.389           | 164.030          | 88.611           | 74.242           | 162.853          | 87.961           | 74.534           | 162.495          | 87.961           | 74.534           | 162.495          |
| 50-54        | 90.450                  | 67.282           | 157.732          | 90.290           | 69.036           | 159.326          | 90.158           | 70.695           | 160.853          | 89.420           | 72.062           | 161.482          | 89.420           | 72.062           | 161.482          |
| 55-59        | 85.820                  | 56.346           | 142.166          | 87.607           | 59.781           | 147.388          | 88.543           | 62.443           | 150.986          | 89.826           | 64.796           | 154.622          | 89.826           | 64.796           | 154.622          |
| 60-64        | 71.450                  | 36.255           | 107.705          | 74.219           | 40.173           | 114.392          | 76.748           | 44.338           | 121.086          | 79.194           | 48.281           | 127.475          | 79.194           | 48.281           | 127.475          |
| 65-69        | 62.572                  | 23.964           | 86.536           | 63.824           | 26.068           | 89.892           | 65.577           | 28.466           | 94.043           | 65.978           | 30.748           | 96.726           | 65.978           | 30.748           | 96.726           |
| 70-74        | 51.161                  | 12.390           | 63.551           | 52.595           | 13.755           | 66.350           | 53.663           | 15.096           | 68.759           | 55.094           | 16.442           | 71.536           | 55.094           | 16.442           | 71.536           |
| 75-79        | 35.993                  | 5.000            | 40.993           | 34.852           | 5.277            | 40.129           | 35.960           | 6.008            | 41.968           | 38.829           | 7.105            | 45.934           | 38.829           | 7.105            | 45.934           |
| 80-84        | 28.304                  | 1.941            | 30.245           | 28.194           | 2.055            | 30.249           | 27.809           | 2.319            | 30.128           | 26.500           | 2.491            | 28.991           | 26.500           | 2.491            | 28.991           |

|              |                |                |                  |                |                |                  |                |                |                  |                |                |                  |                |                |                  |
|--------------|----------------|----------------|------------------|----------------|----------------|------------------|----------------|----------------|------------------|----------------|----------------|------------------|----------------|----------------|------------------|
| 85-89        | 14.160         | 429            | 14.589           | 14.133         | 484            | 14.617           | 14.548         | 588            | 15.136           | 14.814         | 661            | 15.475           | 14.814         | 661            | 15.475           |
| ≥ 90         | 2.944          | 22             | 2.966            | 5.669          | 50             | 5.719            | 6.176          | 77             | 6.253            | 7.350          | 112            | 7.462            | 7.350          | 112            | 7.462            |
| <b>Total</b> | <b>887.357</b> | <b>583.032</b> | <b>1.470.389</b> | <b>884.021</b> | <b>587.962</b> | <b>1.471.983</b> | <b>878.828</b> | <b>592.009</b> | <b>1.470.837</b> | <b>875.395</b> | <b>597.077</b> | <b>1.472.472</b> | <b>875.395</b> | <b>597.077</b> | <b>1.472.472</b> |
